# Supplementary material for: Microfluidic approach for the fabrication of cell-laden hollow fibers for endothelial barrier research
Source: Royal Society of Chemistry journal article supplement (doi:10.1039/c8tb02031k), 2018-01-01
Supplement: c8tb02031k1.pdf [file c8tb02031k1.pdf]

## Supplementary Information

### **Microfluidic approach for the fabrication of cell-laden hollow fiber for endothelial barrier research**

Thi Phuong Thuy Nguyen,<sup>†</sup> Buu Minh Tran<sup>†‡</sup> and Nae Yoon Lee\*

Department of BioNano Technology, College of BioNano Technology, Gachon University, 1342 Seongnam-daero, Sujeong-gu, Seongnam-si, Gyeonggi-do, 13120, Republic of Korea. E-mail: nylee@gachon.ac.kr

<sup>†</sup>These authors contributed equally to this work.

<sup>‡</sup>Current address: Faculty of Science and Engineering, Groningen Institute of Biomolecular Sciences & Biotechnology, Enzymology, University of Groningen, Nijenborgh 4, 9747 AG Groningen, The Netherlands

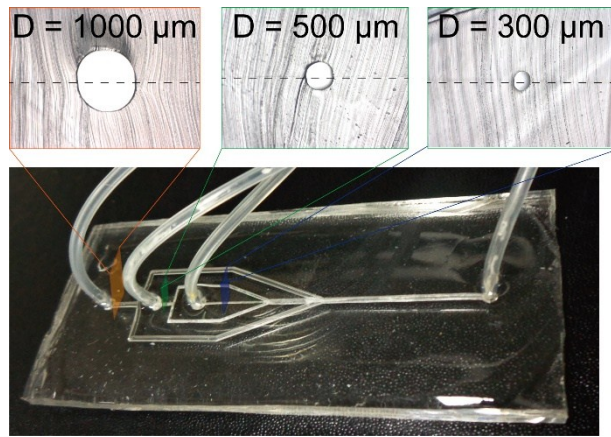

Fig. S1 The cross-section of cylindrical PDMS microdevice fabricated from the assembly of two semi-cylindrical PDMS replicas.
